# Supplementary material for: Identifying the Main Functional Pathways Associated with Cognitive Resilience to Alzheimer’s Disease
Source: MDPI journal article supplement (doi:10.3390/ijms22179120), 2021-08-24

**Supplementary Materials:**

**Supplementary Figure S1.** Gene ontology enrichment analysis on the set of genes differentially expressed between cognitive resilient and impaired aged-Tg2576 mice.

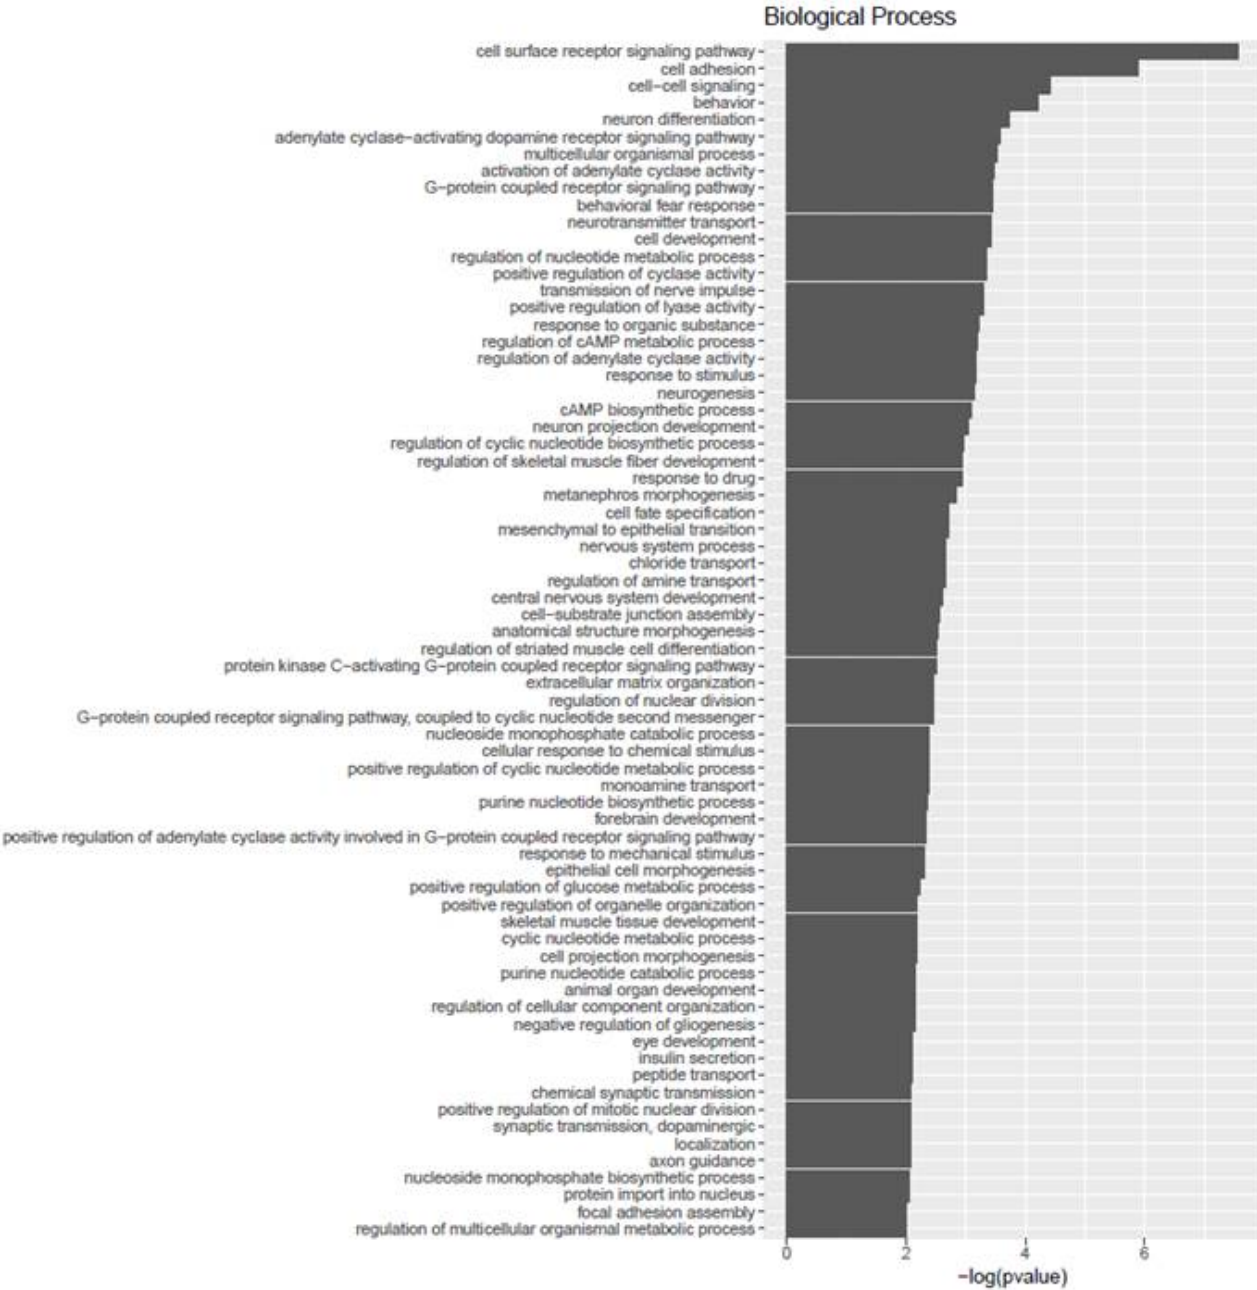

**Supplementary Table S1.** Selected list of genes differentially regulated in the frontal cortex of Tg2576 resilient mice versus Tg5676 impaired mice.

| Gene      | logFC        | AveExpr   | P.Value |
|-----------|--------------|-----------|---------|
| Cd4       | -2,187747606 | 1,2263865 | 3,1300  |
| Tgfa      | -0,613002036 | 4,6245575 | 9,3700  |
| Serpina3n | 0,730005962  | 5,1015890 | 3,6300  |
| Adamts3   | -0,817526617 | 4,0028060 | 0,0002  |
| Hif3a     | -1,03325983  | 3,5322225 | 0,0007  |
| Cyp1b1    | -0,673572171 | 2,3988862 | 0,0007  |
| Cdh1      | -0,68481697  | 2,0765840 | 0,0009  |
| Dcn       | -0,660013737 | 3,3396431 | 0,0010  |
| Foxp2     | -1,073542815 | 3,5439251 | 0,0016  |
| Igkc      | -3,045181249 | 0,8722929 | 0,0009  |
| Drd       | -1,626859726 | 4,1959329 | 0,0021  |
| Dscaml1   | -0,283244744 | 5,9649883 | 0,0011  |
| Rgs9      | -2,498527091 | 4,6380467 | 0,0026  |
| Cd68      | 0,428387668  | 4,3997788 | 0,0026  |
| Gfap      | 0,572170554  | 8,7598089 | 0,0021  |
| Adora2a   | -3,395490997 | 2,8744816 | 0,0052  |
| Il17rc    | -0,579977355 | 1,8306808 | 0,0064  |
| Bmp4      | -0,601526445 | 1,8692572 | 0,0075  |
| clxcl10   | 1,478093873  | 0,1663201 | 0,0051  |

**Supplementary Table S2.** Patient demographic and clinical characteristics related to brain samples.

|                             | Normal controls | AD patients     |
|-----------------------------|-----------------|-----------------|
| Number of subjects          | 9               | 10              |
| Age (years mean $\pm$ S.D.) | 73 $\pm$ 13,64  | 77,30 $\pm$ 7,8 |
| Gender (% women)            | 11%             | 40%             |
| Braak stage                 | -----           | IV -VI          |

**Supplementary Figure S2.** Correlations between CD4 mRNA levels and MMSE score in MCI and AD patients.

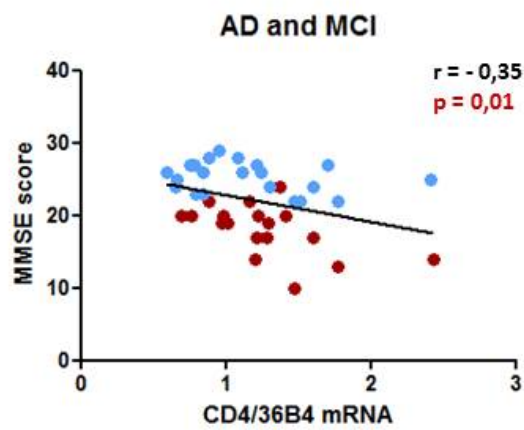

Supplement: s1 [file s1]
